# Supplementary material
Source: publisher figshare collection journal article supplement (https://acs.figshare.com/ndownloader/files/4561075)
Supplement: Supplementary file 1 [file 4561075]

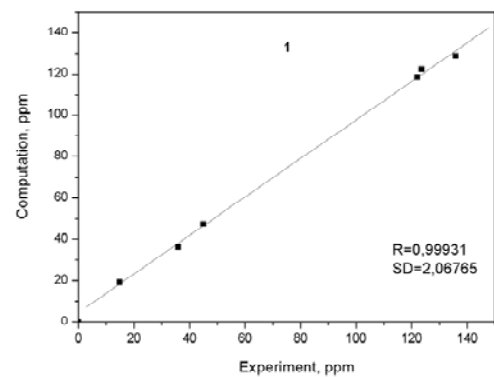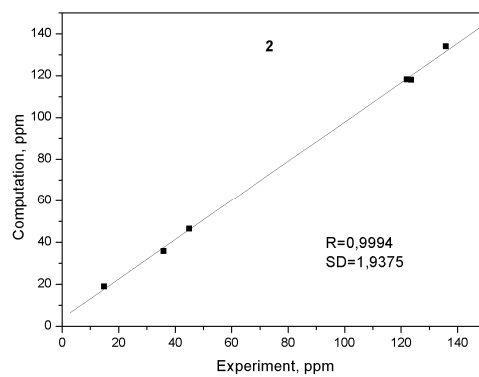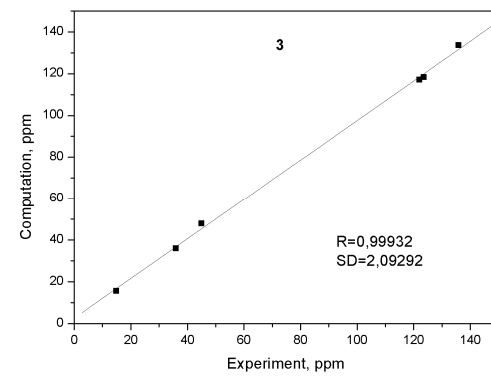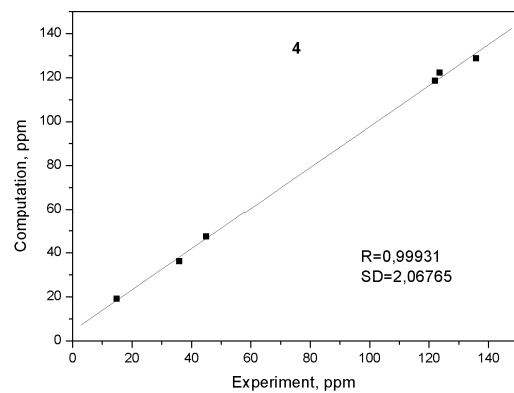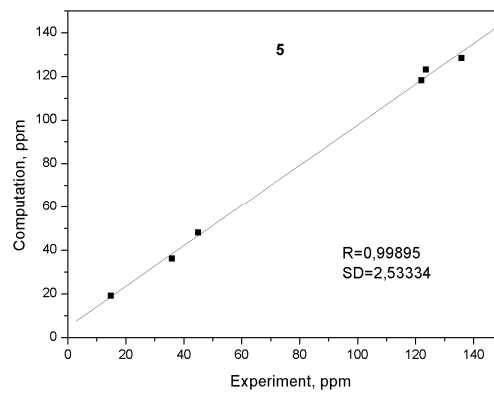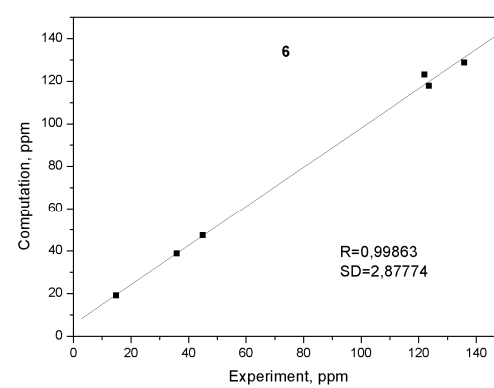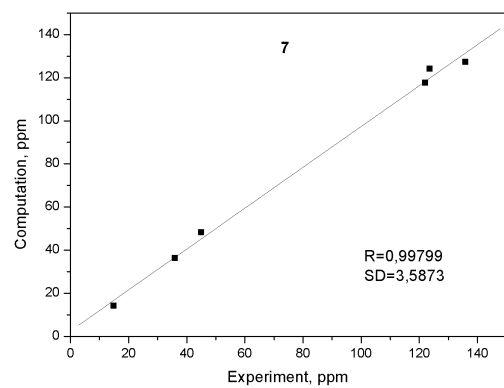

**Figure 1S** Comparison of the experimental  $^{13}\text{C}$  NMR chemical shifts of  $[\text{EMIM}][\text{BF}_4]$  in dichloromethane and  $^{13}\text{C}$  NMR chemical shifts computed for structures **1-7** (Figure 1) of types A (top), B (medium), C (bottom) immersed in a polarisable continuum.
